# Supplementary material for: Global disease burden of breast cancer attributable to high fasting plasma glucose: a comprehensive analysis from the global burden of disease study
Source: Front Endocrinol (Lausanne). 2025 Feb 13;16:1498207. doi: 10.3389/fendo.2025.1498207 (PMC11864957; doi:10.3389/fendo.2025.1498207)
Supplement: Supplementary file 5 [file Table5.xlsx]

## Sheet: nation_death_daly__num_rate_199
Table S5. The burden of breast cancer due to high fasting plasma glucose across 204 nations and the temporal trends
Characteristics	1990				2021				EAPC of ASMR No. (95% CI)	EAPC of ASDR No. (95% CI)
	Death number (95% UI)	ASMR (95% UI)	DALY (95% UI)	ASDR (95% UI)	Death number (95% UI)	ASMR (95% UI)	DALY (95% UI)	ASDR (95% UI)
Afghanistan	14.07 (-3.5-40.3)	0.41 (-0.1-1.12)	449.39 (-111.3-1323.23)	12.09 (-3-34.9)	55.13 (-14.09-160.64)	0.92 (-0.25-2.44)	1970.49 (-516.32-5887.08)	27.92 (-7.11-79.06)	2.87 (2.58 to 3.07)	2.97 (2.65 to 3.21)
Albania	2.26 (-0.66-5.75)	0.22 (-0.06-0.55)	59.26 (-17.01-154.1)	5.43 (-1.57-14.05)	9.02 (-2.21-22.78)	0.4 (-0.1-1)	211.27 (-52.23-520.12)	9.67 (-2.38-23.59)	2.46 (2.25 to 2.61)	2.43 (2.21 to 2.59)
Algeria	16.49 (-4.38-40.05)	0.33 (-0.09-0.78)	500.62 (-131.93-1252.5)	7.99 (-2.12-19.66)	90.88 (-24.54-219.65)	0.57 (-0.15-1.38)	2810.13 (-744.35-6800.37)	14.78 (-3.93-35.79)	2.51 (2.24 to 2.72)	2.35 (2.17 to 2.48)
American Samoa	0.21 (-0.06-0.49)	1.94 (-0.53-4.51)	6.69 (-1.85-15.19)	52.54 (-14.46-123.64)	0.87 (-0.28-1.98)	3.61 (-1.14-8.34)	26.23 (-8.49-59.32)	100.98 (-32.22-229.91)	2.30 (2.18 to 2.37)	2.41 (2.28 to 2.48)
Andorra	0.18 (-0.05-0.48)	0.68 (-0.18-1.75)	5.18 (-1.39-13.62)	18.53 (-4.93-48.57)	0.57 (-0.14-1.42)	0.7 (-0.18-1.76)	14.13 (-3.6-34.93)	18.96 (-4.86-47.6)	0.48 (0.31 to 0.65)	0.45 (0.28 to 0.61)
Angola	5.48 (-1.42-13.65)	0.29 (-0.08-0.71)	175.55 (-45.94-447.87)	7.73 (-2.04-19.25)	39.88 (-9.94-108.29)	0.63 (-0.16-1.71)	1236.03 (-318.32-3338.44)	16.39 (-4.1-44.52)	2.70 (2.57 to 2.76)	2.59 (2.44 to 2.67)
Antigua and Barbuda	0.37 (-0.1-0.9)	1.17 (-0.3-2.85)	8.09 (-2.13-19.71)	28.33 (-7.51-68.32)	1.03 (-0.28-2.47)	1.83 (-0.5-4.42)	26.82 (-7.59-64.67)	45.81 (-12.89-110.11)	1.63 (1.41 to 1.82)	1.75 (1.52 to 1.95)
Argentina	186.16 (-53.06-444.16)	1.04 (-0.3-2.46)	4605.4 (-1337.23-11202.07)	25.91 (-7.56-62.86)	391.35 (-103.77-915.85)	1.22 (-0.32-2.81)	9146.66 (-2418.7-21168.74)	30.56 (-8.08-71.35)	0.55 (0.33 to 0.77)	0.56 (0.35 to 0.77)
Armenia	10.44 (-2.7-25.01)	0.66 (-0.17-1.61)	310.87 (-78.76-738.24)	19.13 (-4.91-45.56)	22.75 (-6.23-54.1)	0.88 (-0.24-2.1)	553.4 (-152.48-1312.29)	21.98 (-6.02-51.44)	0.94 (0.50 to 1.38)	0.46 (0.02 to 0.89)
Australia	75.54 (-21.96-176.8)	0.7 (-0.2-1.65)	1879.53 (-539.55-4376.67)	18.43 (-5.28-42.58)	173.17 (-52.83-391.26)	0.7 (-0.22-1.58)	4113.23 (-1264.86-9443.19)	19.02 (-5.85-43.42)	0.03 (-0.08 to 0.13)	0.11 (-0.02 to 0.24)
Austria	37.9 (-10.57-90.82)	0.51 (-0.14-1.21)	832.4 (-232.81-1998.22)	12.67 (-3.53-30.72)	57.15 (-15.24-134.35)	0.51 (-0.14-1.21)	1140.95 (-299.32-2687.46)	12.21 (-3.21-28.8)	0.11 (0.01 to 0.22)	-0.02 (-0.14 to 0.10)
Azerbaijan	10.44 (-2.89-24.2)	0.36 (-0.1-0.82)	320.32 (-87.92-748.8)	10.67 (-2.97-24.76)	36.11 (-8.92-86.9)	0.6 (-0.15-1.44)	1116.31 (-269.36-2663.33)	17.48 (-4.28-41.96)	2.21 (1.90 to 2.48)	1.95 (1.69 to 2.16)
Bahamas	1.27 (-0.35-3.04)	1.47 (-0.41-3.51)	36.75 (-9.94-87.26)	40.61 (-11.03-96)	4.82 (-1.21-11.23)	2.16 (-0.54-5.05)	139.07 (-35.41-327.59)	58.95 (-14.88-138.25)	1.64 (1.43 to 1.82)	1.64 (1.43 to 1.81)
Bahrain	1.06 (-0.26-2.51)	1.39 (-0.34-3.28)	33.5 (-8.48-78.09)	36.97 (-9.13-87.26)	7.19 (-2.19-16.22)	1.99 (-0.63-4.44)	236.19 (-70.98-530.48)	53.41 (-16.63-119.02)	0.86 (0.66 to 1.05)	0.89 (0.74 to 1.03)
Bangladesh	34.54 (-8.65-87.82)	0.14 (-0.04-0.35)	1359.19 (-331.64-3462.93)	5 (-1.24-12.7)	212.82 (-61.05-516.18)	0.28 (-0.08-0.67)	8183.45 (-2349.79-20155.21)	10.28 (-2.95-25.13)	2.20 (1.98 to 2.37)	2.30 (2.05 to 2.50)
Barbados	3.1 (-0.9-7.36)	1.82 (-0.52-4.29)	69.2 (-19.82-163.13)	45.36 (-12.99-106.26)	7.13 (-2.07-16.43)	2.5 (-0.73-5.79)	168.25 (-50.31-392.09)	62.15 (-18.61-146.21)	1.39 (1.15 to 1.61)	1.40 (1.17 to 1.61)
Belarus	22.18 (-5.91-51.67)	0.28 (-0.08-0.65)	641.13 (-171.23-1519.69)	8.4 (-2.28-20.15)	37.12 (-9.9-93.95)	0.37 (-0.1-0.94)	966.26 (-268.11-2470.42)	10.4 (-2.92-26.94)	0.09 (-0.24 to 0.41)	-0.17 (-0.49 to 0.15)
Belgium	86.56 (-26.26-202.05)	0.96 (-0.29-2.25)	1999.08 (-609.21-4734.27)	25 (-7.39-58.5)	108.41 (-29.38-253.26)	0.78 (-0.21-1.83)	2256.73 (-622.56-5292.66)	19.67 (-5.52-45.82)	-0.69 (-0.76 to -0.62)	-0.88 (-1.02 to -0.75)
Belize	0.17 (-0.05-0.42)	0.37 (-0.1-0.91)	4.38 (-1.22-10.55)	9.48 (-2.63-22.83)	1.04 (-0.3-2.45)	0.69 (-0.2-1.66)	31.11 (-9.3-72.27)	18.85 (-5.54-43.84)	2.07 (1.58 to 2.52)	2.27 (1.79 to 2.70)
Benin	2.04 (-0.55-5.05)	0.21 (-0.06-0.51)	56.5 (-14.8-140.27)	5.25 (-1.4-13.15)	12.48 (-3.04-31.78)	0.48 (-0.11-1.2)	345.07 (-86.44-878.79)	11.67 (-2.88-29.52)	2.86 (2.74 to 2.90)	2.64 (2.50 to 2.72)
Bermuda	0.51 (-0.14-1.18)	1.46 (-0.41-3.38)	12.48 (-3.68-28.43)	35.57 (-10.51-80.95)	0.86 (-0.27-1.99)	1.09 (-0.34-2.57)	19.21 (-6.15-44.2)	28.77 (-9.1-66.82)	-1.19 (-1.50 to -0.90)	-1.00 (-1.32 to -0.68)
Bhutan	0.24 (-0.06-0.57)	0.19 (-0.05-0.45)	7.87 (-2.07-18.99)	5.52 (-1.46-13.28)	1.02 (-0.29-2.59)	0.35 (-0.1-0.88)	28.67 (-7.93-70.22)	9.21 (-2.56-22.84)	1.88 (1.82 to 1.91)	1.54 (1.48 to 1.59)
Bolivia (Plurinational State of)	7.39 (-1.77-20.71)	0.44 (-0.1-1.23)	209.23 (-51.14-583.72)	11.6 (-2.82-32.31)	42.07 (-9.35-110.46)	0.88 (-0.19-2.33)	1164.04 (-271.7-2972.88)	23.08 (-5.35-59.02)	2.24 (2.14 to 2.30)	2.24 (2.15 to 2.28)
Bosnia and Herzegovina	9.51 (-2.48-22.26)	0.42 (-0.11-0.98)	271.13 (-70.67-645.06)	11.18 (-2.88-26.73)	38.22 (-9.88-92.14)	1.06 (-0.28-2.54)	871.69 (-233.66-2103.91)	25.8 (-6.97-61.96)	3.69 (3.29 to 3.96)	3.36 (2.95 to 3.66)
Botswana	1.12 (-0.27-2.91)	0.42 (-0.1-1.13)	30.24 (-7.12-79.77)	9.73 (-2.31-25.39)	6.61 (-1.66-15.88)	0.86 (-0.21-2.12)	175.62 (-45.62-428.87)	20.32 (-5.14-49.11)	2.97 (2.55 to 3.31)	3.07 (2.61 to 3.44)
Brazil	285.84 (-79.01-671.06)	0.62 (-0.17-1.46)	8097.85 (-2270.62-18767.39)	16.09 (-4.49-37.44)	1143.46 (-317.73-2607.14)	0.82 (-0.23-1.88)	31714.39 (-9081.65-72185.57)	22.9 (-6.56-52.15)	0.93 (0.88 to 0.97)	1.09 (1.04 to 1.12)
Brunei Darussalam	0.43 (-0.12-1.08)	0.83 (-0.22-2.09)	14.42 (-4.15-36.31)	24.57 (-6.82-61.11)	2.06 (-0.54-4.74)	1.08 (-0.28-2.49)	68.42 (-17.8-158.74)	31.87 (-8.34-73.29)	1.44 (1.24 to 1.62)	1.40 (1.18 to 1.61)
Bulgaria	49.55 (-15.09-117.6)	0.77 (-0.24-1.79)	1395.74 (-431.12-3268.67)	21.46 (-6.75-50.61)	99.22 (-27.15-243.55)	1.19 (-0.33-2.93)	2271.41 (-630.06-5561.79)	30.77 (-8.51-74.39)	1.68 (1.52 to 1.81)	1.32 (1.19 to 1.43)
Burkina Faso	7.22 (-1.94-17.44)	0.36 (-0.1-0.88)	202.71 (-54.16-499.04)	8.57 (-2.29-20.92)	30.82 (-7.96-75.14)	0.68 (-0.18-1.67)	831.48 (-212.86-2000.82)	15.93 (-4.12-38.76)	2.11 (1.93 to 2.24)	2.03 (1.84 to 2.17)
Burundi	3.32 (-0.92-8.34)	0.28 (-0.08-0.68)	94.59 (-26.29-244.17)	7.08 (-1.95-17.98)	7.22 (-1.79-18.09)	0.34 (-0.09-0.86)	210.53 (-51.45-529.54)	8.19 (-2.03-20.42)	0.32 (0.13 to 0.52)	0.06 (-0.15 to 0.28)
Cabo Verde	0.53 (-0.13-1.27)	0.41 (-0.1-0.99)	13.56 (-3.34-31.9)	11.02 (-2.72-26.1)	2.05 (-0.55-5.09)	0.8 (-0.22-1.98)	50.86 (-14.23-124.33)	19.67 (-5.51-48.23)	2.56 (2.27 to 2.78)	2.28 (1.98 to 2.53)
Cambodia	5.7 (-1.46-15.93)	0.23 (-0.06-0.64)	171.55 (-44.32-485.97)	6.08 (-1.55-16.98)	42.8 (-9.35-109.38)	0.61 (-0.13-1.55)	1175.66 (-262.74-3050.31)	15.44 (-3.43-39.82)	3.29 (3.13 to 3.34)	3.05 (2.96 to 3.06)
Cameroon	7.3 (-1.96-17.59)	0.34 (-0.09-0.82)	212.27 (-56.36-512.41)	8.57 (-2.3-20.65)	48.14 (-11.57-120.7)	0.76 (-0.18-1.91)	1450.93 (-345.58-3602.93)	19.55 (-4.7-49.09)	2.77 (2.63 to 2.83)	2.79 (2.64 to 2.87)
Canada	106.34 (-29.57-251.95)	0.57 (-0.16-1.35)	2562.2 (-708.35-6067.09)	14.61 (-4.02-34.52)	246.59 (-67.91-598.15)	0.59 (-0.16-1.42)	5289.02 (-1432.13-12402.12)	14.39 (-3.86-33.96)	-0.09 (-0.18 to 0.00)	-0.23 (-0.32 to -0.14)
Central African Republic	3.31 (-0.94-8.56)	0.52 (-0.15-1.29)	111.99 (-31.28-299.83)	15.14 (-4.28-39.56)	10.1 (-2.52-25.49)	0.79 (-0.19-1.94)	345.35 (-88.81-887.77)	22.64 (-5.61-56.8)	1.35 (1.30 to 1.38)	1.29 (1.24 to 1.33)
Chad	3.25 (-1.07-8.1)	0.23 (-0.08-0.58)	91.25 (-29.67-232.14)	5.98 (-1.96-15.25)	12.73 (-3.39-32.72)	0.5 (-0.12-1.26)	380.72 (-102.74-976.32)	12.62 (-3.36-32.64)	2.63 (2.50 to 2.68)	2.55 (2.44 to 2.60)
Chile	29.33 (-8.16-68.96)	0.54 (-0.15-1.29)	767.55 (-213.34-1841.93)	13.76 (-3.83-32.95)	100.58 (-26.3-234.15)	0.7 (-0.18-1.62)	2401.6 (-652.86-5601.86)	17.53 (-4.81-41.09)	0.92 (0.74 to 1.09)	0.89 (0.73 to 1.05)
China	1215.72 (-352.87-3033.7)	0.29 (-0.08-0.7)	38267.9 (-11204.74-95717.48)	8.3 (-2.44-20.77)	3558.23 (-1132.75-8732.26)	0.32 (-0.1-0.79)	108490 (-34462.91-263635.84)	9.99 (-3.16-24.13)	0.25 (0.06 to 0.45)	0.50 (0.34 to 0.66)
Colombia	44.87 (-13.11-107.33)	0.51 (-0.15-1.22)	1266.69 (-371.84-3048.07)	13.19 (-3.85-31.68)	191.59 (-54.87-463.38)	0.63 (-0.18-1.52)	5189.66 (-1475.77-12579.52)	17.26 (-4.91-41.99)	0.31 (-0.06 to 0.67)	0.51 (0.15 to 0.87)
Comoros	0.27 (-0.07-0.71)	0.3 (-0.08-0.79)	7.67 (-2.06-19.89)	7.24 (-1.94-18.88)	1.45 (-0.33-3.85)	0.59 (-0.13-1.58)	38.15 (-8.83-100.24)	13.92 (-3.19-36.75)	2.10 (2.02 to 2.14)	2.02 (1.91 to 2.09)
Congo	2.63 (-0.6-7.77)	0.48 (-0.11-1.33)	77.95 (-18.33-228.03)	12.4 (-2.85-36.08)	13.83 (-3.29-37.37)	1 (-0.23-2.69)	434.69 (-106.26-1148.51)	26.47 (-6.3-71.14)	2.43 (2.33 to 2.47)	2.51 (2.39 to 2.56)
Cook Islands	0.16 (-0.04-0.4)	2.79 (-0.71-7.05)	4.64 (-1.16-11.74)	73.15 (-18.23-185.05)	0.46 (-0.15-1.07)	3.45 (-1.09-7.91)	11.59 (-3.73-26.73)	90.18 (-28.87-209.09)	0.69 (0.53 to 0.83)	0.70 (0.52 to 0.87)
Costa Rica	4.21 (-1.18-9.91)	0.47 (-0.13-1.11)	117.47 (-33.38-281.14)	12.62 (-3.56-30.14)	26.19 (-7.37-61.95)	0.87 (-0.25-2.06)	703.05 (-206.99-1662.08)	23.67 (-6.96-56.04)	1.89 (1.67 to 2.08)	1.90 (1.71 to 2.06)
Croatia	29.8 (-7.85-70.34)	0.84 (-0.22-1.97)	714.95 (-187.09-1668.9)	20.02 (-5.26-46.58)	56.46 (-17.01-130.79)	1.02 (-0.31-2.37)	1152.53 (-339.56-2695.75)	23.79 (-6.87-55.82)	0.95 (0.72 to 1.17)	0.77 (0.56 to 0.96)
Cuba	39.65 (-10.56-93.66)	0.78 (-0.21-1.83)	1032.24 (-273.75-2471.03)	20.02 (-5.31-47.92)	111.09 (-30.33-266.92)	1.04 (-0.28-2.52)	2659.4 (-727.6-6465.35)	26.68 (-7.26-65.15)	1.08 (0.91 to 1.24)	1.07 (0.91 to 1.22)
Cyprus	4.48 (-1.18-11.39)	1.09 (-0.28-2.79)	104.37 (-27.41-261.1)	24.03 (-6.28-59.1)	11.11 (-2.97-26.23)	1.02 (-0.27-2.43)	255.79 (-70.74-601.88)	23.94 (-6.63-56.52)	-0.18 (-0.38 to 0.02)	0.08 (-0.16 to 0.32)
Czechia	72.12 (-22-167.32)	0.86 (-0.26-1.99)	1639.39 (-497.82-3796.26)	20.75 (-6.25-48.12)	134.38 (-38.07-318.66)	1.02 (-0.29-2.43)	2737.04 (-771.7-6496.04)	23.5 (-6.62-56.09)	0.26 (0.05 to 0.46)	0.09 (-0.11 to 0.29)
C么te d'Ivoire	7.22 (-1.86-18.5)	0.41 (-0.11-1.03)	224.3 (-57.64-580.78)	10.52 (-2.73-26.78)	47.59 (-11.07-115.79)	0.92 (-0.22-2.26)	1426.1 (-340.5-3529.83)	23.62 (-5.46-57.45)	2.96 (2.78 to 3.06)	2.92 (2.76 to 2.99)
Democratic People's Republic of Korea	27.56 (-6.86-71.97)	0.28 (-0.07-0.73)	869.56 (-216.19-2295.1)	8.19 (-2.01-21.43)	76.14 (-20.06-199.88)	0.4 (-0.11-1.05)	2235.93 (-586.94-5814.86)	11.99 (-3.18-31.38)	1.34 (1.26 to 1.41)	1.39 (1.32 to 1.44)
Democratic Republic of the Congo	43.54 (-12.89-112.32)	0.5 (-0.15-1.24)	1473.85 (-432.03-3845.65)	14.59 (-4.25-37.32)	158.1 (-41.13-409.15)	0.77 (-0.2-1.98)	5180.15 (-1340.42-13427.92)	21.74 (-5.63-56.49)	1.34 (0.99 to 1.68)	1.23 (0.86 to 1.59)
Denmark	32.43 (-8.65-75.99)	0.71 (-0.19-1.69)	747.5 (-206.67-1787.35)	18.68 (-5.31-44.78)	44.46 (-11.96-103.76)	0.64 (-0.17-1.48)	872.58 (-237.9-2027.86)	14.55 (-4.05-33.92)	-0.37 (-0.51 to -0.24)	-0.81 (-0.98 to -0.64)
Djibouti	0.18 (-0.04-0.45)	0.29 (-0.07-0.72)	5.45 (-1.3-14.29)	7.14 (-1.79-18.42)	1.57 (-0.36-3.94)	0.61 (-0.14-1.54)	46.24 (-10.19-113.76)	14.14 (-3.27-35.61)	2.52 (2.42 to 2.56)	2.26 (2.17 to 2.29)
Dominica	0.51 (-0.14-1.17)	1.4 (-0.39-3.23)	11.48 (-3.18-26.66)	33.12 (-9.18-76.27)	0.93 (-0.29-2.25)	2.1 (-0.66-5.05)	22.97 (-7.23-55.26)	53.58 (-16.91-128.85)	1.52 (1.43 to 1.60)	1.78 (1.68 to 1.84)
Dominican Republic	5.09 (-1.3-11.77)	0.3 (-0.08-0.7)	142.98 (-35.86-318.84)	7.19 (-1.81-16.23)	28.32 (-7.54-69.68)	0.54 (-0.14-1.33)	783.74 (-202.77-1972.68)	14.79 (-3.82-37.28)	2.57 (2.27 to 2.82)	2.95 (2.68 to 3.14)
Ecuador	8 (-2.27-19)	0.3 (-0.08-0.7)	233.06 (-64.04-555.78)	8.02 (-2.22-19.07)	63.3 (-15.26-147.89)	0.74 (-0.18-1.72)	1706.26 (-401.98-3974.33)	19.61 (-4.63-45.69)	3.16 (2.86 to 3.36)	3.09 (2.82 to 3.27)
Egypt	26.31 (-7.36-62.91)	0.2 (-0.06-0.48)	861.29 (-233.26-2106.41)	5.56 (-1.58-13.39)	315.66 (-85.6-802.06)	1.22 (-0.34-3)	9514.19 (-2536.28-23978.67)	29.95 (-8.17-75.68)	7.00 (6.22 to 7.30)	6.35 (5.70 to 6.62)
El Salvador	3.18 (-0.89-7.43)	0.2 (-0.06-0.46)	95.21 (-26.88-224.5)	5.72 (-1.63-13.49)	18.84 (-5.21-46.45)	0.53 (-0.15-1.3)	530.66 (-145.02-1314.72)	15.14 (-4.14-37.59)	3.06 (2.84 to 3.18)	3.08 (2.86 to 3.22)
Equatorial Guinea	0.41 (-0.11-1.05)	0.39 (-0.1-0.98)	12.9 (-3.37-33.76)	10.66 (-2.78-27.35)	4.85 (-1.17-12.56)	1.54 (-0.38-3.96)	167.54 (-39.57-428.66)	44.64 (-10.61-114.86)	5.22 (4.87 to 5.31)	5.44 (5.05 to 5.54)
Eritrea	1.33 (-0.35-3.62)	0.22 (-0.06-0.56)	43.77 (-10.85-123.42)	5.79 (-1.55-15.57)	7.45 (-1.64-20.25)	0.54 (-0.12-1.47)	209.78 (-46.82-555.63)	12.45 (-2.74-33.59)	2.99 (2.90 to 3.00)	2.53 (2.46 to 2.53)
Estonia	5.7 (-1.52-13.22)	0.44 (-0.12-1.03)	150.31 (-39.27-353.47)	12.38 (-3.21-29.21)	10.38 (-2.64-25.22)	0.58 (-0.15-1.41)	215.93 (-55.85-527.4)	14.57 (-3.77-35.21)	0.87 (0.71 to 1.02)	0.42 (0.24 to 0.60)
Eswatini	0.73 (-0.18-1.88)	0.52 (-0.13-1.31)	18.93 (-4.77-47.6)	11.66 (-2.92-29.48)	3.9 (-0.83-10.57)	1.27 (-0.27-3.5)	105.68 (-21.88-292.48)	30.49 (-6.4-83.38)	3.32 (2.85 to 3.68)	3.53 (3.02 to 3.92)
Ethiopia	34.16 (-8.15-96.92)	0.41 (-0.1-1.12)	1036.57 (-246.06-3036.05)	10.02 (-2.39-28.25)	92.4 (-23.42-225.97)	0.46 (-0.12-1.14)	2582.68 (-658.75-6378.31)	10.88 (-2.76-26.48)	0.26 (0.07 to 0.45)	0.01 (-0.20 to 0.22)
Fiji	3.71 (-1-9)	2.01 (-0.53-4.83)	122 (-33.21-301.92)	55.96 (-15.15-135.72)	12.7 (-3.72-30.57)	3.18 (-0.93-7.57)	375.24 (-111.73-918.9)	85.66 (-25.43-208.9)	1.47 (1.37 to 1.55)	1.39 (1.29 to 1.48)
Finland	35.45 (-10.59-79.9)	0.82 (-0.24-1.86)	847.43 (-250.98-1952.45)	21.63 (-6.32-50.11)	59 (-16.13-141.74)	0.79 (-0.22-1.88)	1239.88 (-341.46-2891.17)	20.53 (-5.89-48.18)	-0.01 (-0.08 to 0.06)	-0.05 (-0.16 to 0.06)
France	295.25 (-80.98-697.34)	0.61 (-0.17-1.43)	6805.69 (-1871.66-15837.67)	16.02 (-4.39-37.28)	485.79 (-130.21-1141.43)	0.58 (-0.16-1.34)	10431.74 (-2873.43-24375)	15.76 (-4.35-37.56)	-0.12 (-0.23 to 0.00)	-0.01 (-0.15 to 0.12)
Gabon	2.11 (-0.56-5.34)	0.7 (-0.18-1.78)	61.3 (-15.91-157.53)	19.3 (-5.05-49.47)	9.14 (-2.43-22.71)	1.59 (-0.42-3.94)	295.72 (-79.98-740.27)	45.77 (-12.31-114.2)	2.57 (2.34 to 2.74)	2.68 (2.42 to 2.88)
Gambia	0.22 (-0.05-0.54)	0.14 (-0.03-0.34)	6.26 (-1.53-15.6)	3.55 (-0.87-8.81)	1.84 (-0.47-4.56)	0.37 (-0.09-0.93)	52.05 (-13.25-128.28)	9.61 (-2.46-23.51)	3.21 (3.01 to 3.31)	3.12 (2.88 to 3.27)
Georgia	17.66 (-4.57-41.4)	0.47 (-0.12-1.09)	500.56 (-130.95-1181.13)	13.58 (-3.56-31.66)	39.44 (-10.12-97.47)	1.09 (-0.28-2.73)	937.08 (-244.16-2328.67)	27.87 (-7.32-69.07)	3.62 (3.15 to 3.97)	2.96 (2.58 to 3.25)
Germany	717.2 (-194.09-1742.27)	0.89 (-0.24-2.14)	15932 (-4373.85-38203.9)	22.31 (-6.12-52.91)	1143.97 (-291.83-2805.31)	0.96 (-0.24-2.35)	22537.13 (-5671.3-56037.84)	22.91 (-5.79-56.68)	0.23 (0.14 to 0.32)	0.07 (0.00 to 0.14)
Ghana	11.99 (-3.16-29.03)	0.4 (-0.11-0.96)	352.32 (-90.61-866.25)	10 (-2.63-24.31)	82.64 (-22.05-204.76)	0.9 (-0.24-2.22)	2462.46 (-655.4-6216.95)	23.34 (-6.23-58.7)	2.72 (2.59 to 2.78)	2.79 (2.69 to 2.82)
Greece	64.95 (-18.14-149.37)	0.79 (-0.22-1.81)	1611.47 (-448.65-3633.66)	20.59 (-5.73-46)	125.66 (-37.05-295.13)	0.87 (-0.26-2)	2435.06 (-722.51-5692.27)	20.73 (-6.11-48.19)	-0.21 (-0.43 to 0.01)	-0.37 (-0.52 to -0.22)
Greenland	0.07 (-0.02-0.16)	0.4 (-0.1-1)	1.88 (-0.49-4.69)	10.39 (-2.67-25.81)	0.16 (-0.04-0.4)	0.5 (-0.14-1.28)	4.42 (-1.19-10.99)	12.87 (-3.52-32.05)	0.37 (0.06 to 0.68)	0.32 (0.09 to 0.55)
Grenada	0.49 (-0.13-1.17)	1.15 (-0.31-2.69)	11.16 (-3.01-25.83)	29.63 (-8-67.76)	1.16 (-0.31-2.75)	1.94 (-0.52-4.57)	31.23 (-8.17-74.14)	51.61 (-13.41-122.76)	2.05 (1.69 to 2.37)	2.15 (1.80 to 2.45)
Guam	0.35 (-0.1-0.83)	1.1 (-0.32-2.58)	10.58 (-3.05-24.71)	26.46 (-7.81-61.57)	1.01 (-0.26-2.52)	0.95 (-0.24-2.33)	31.34 (-8.06-76.36)	30.92 (-8-75.57)	0.38 (0.03 to 0.74)	1.16 (0.91 to 1.39)
Guatemala	3.2 (-0.91-7.66)	0.19 (-0.05-0.46)	98.26 (-27.9-232.09)	5 (-1.43-11.9)	26.86 (-7.5-65.8)	0.46 (-0.13-1.12)	783.95 (-226.29-1911.22)	12.58 (-3.58-30.67)	2.75 (2.32 to 3.11)	3.04 (2.64 to 3.35)
Guinea	4.57 (-1.17-11.36)	0.28 (-0.07-0.68)	132.61 (-34.24-323.45)	7.56 (-1.96-18.52)	16.75 (-3.78-40.55)	0.6 (-0.14-1.45)	496.47 (-111.43-1222.02)	15.99 (-3.59-39.21)	2.52 (2.47 to 2.51)	2.45 (2.38 to 2.45)
Guinea-Bissau	0.67 (-0.17-1.81)	0.34 (-0.08-0.89)	21.21 (-5.05-57.72)	9.13 (-2.25-24.5)	2.86 (-0.66-7.78)	0.75 (-0.17-2.06)	89.09 (-20.9-244.3)	19.48 (-4.47-53.21)	2.84 (2.71 to 2.89)	2.61 (2.51 to 2.64)
Guyana	2.45 (-0.68-5.8)	1.26 (-0.35-2.99)	72.14 (-20.2-167.92)	33.95 (-9.45-79.58)	6.65 (-2.08-15.5)	1.89 (-0.59-4.39)	203.5 (-64.1-484.52)	54.65 (-17.14-129.75)	1.75 (1.47 to 1.99)	2.02 (1.71 to 2.28)
Haiti	13.97 (-3.52-40.5)	0.88 (-0.22-2.49)	407.01 (-103.73-1189.63)	22.84 (-5.84-66.09)	43.73 (-11.63-117.14)	1.2 (-0.32-3.2)	1314.05 (-350.94-3569.8)	30.84 (-8.21-82.87)	1.20 (1.09 to 1.30)	1.18 (1.07 to 1.28)
Honduras	2.42 (-0.59-5.92)	0.23 (-0.06-0.57)	72.6 (-18.02-172.64)	6.36 (-1.58-15.34)	20.79 (-5.9-51.31)	0.62 (-0.17-1.54)	594.95 (-172.04-1481.52)	16.44 (-4.71-40.79)	3.15 (2.78 to 3.42)	3.05 (2.73 to 3.28)
Hungary	76.63 (-21.14-185.31)	0.88 (-0.24-2.14)	1823.71 (-511.25-4366.84)	21.93 (-6.12-52.47)	125.97 (-32.56-307.04)	1.03 (-0.27-2.49)	2712.1 (-705.1-6566.76)	25.1 (-6.54-61.34)	0.05 (-0.20 to 0.30)	0.02 (-0.22 to 0.26)
Iceland	1.17 (-0.33-2.76)	0.76 (-0.21-1.8)	29.55 (-7.96-69.18)	20.96 (-5.58-49.14)	2.22 (-0.6-5.08)	0.71 (-0.2-1.62)	51.41 (-14.66-120.58)	18.67 (-5.4-44.01)	-0.14 (-0.31 to 0.03)	-0.36 (-0.51 to -0.21)
India	662.1 (-197.99-1557.42)	0.28 (-0.08-0.68)	21900.26 (-6658.22-50386.78)	8.34 (-2.52-19.54)	3705.72 (-961.88-9188.58)	0.6 (-0.16-1.5)	111408.85 (-29409.36-270643.59)	17.08 (-4.49-41.73)	2.39 (2.20 to 2.52)	2.29 (2.10 to 2.43)
Indonesia	150.14 (-38.61-415.45)	0.29 (-0.08-0.79)	4746.72 (-1198.46-13126.84)	8.13 (-2.08-22.6)	844.48 (-199.31-2355.67)	0.67 (-0.16-1.87)	25666.58 (-6175.18-71674.41)	18.29 (-4.35-50.85)	2.68 (2.57 to 2.71)	2.47 (2.31 to 2.58)
Iran (Islamic Republic of)	24.2 (-6.69-59.4)	0.19 (-0.05-0.48)	804.91 (-224.7-1969.29)	5.66 (-1.58-13.88)	196.79 (-56.88-462.37)	0.5 (-0.14-1.17)	6423.58 (-1854.56-14944.66)	14.76 (-4.24-34.62)	3.53 (3.25 to 3.68)	3.59 (3.29 to 3.76)
Iraq	24.62 (-6.42-58.33)	0.58 (-0.15-1.37)	839.16 (-217.6-2010.55)	18.81 (-4.9-44.9)	157.89 (-45.58-394.55)	1.22 (-0.35-3.06)	5444.53 (-1600.34-13515.61)	37.59 (-10.94-92.33)	2.64 (2.47 to 2.75)	2.52 (2.34 to 2.63)
Ireland	20.06 (-5.72-47.88)	0.92 (-0.26-2.2)	497.73 (-140.39-1218.62)	24.45 (-6.85-59.28)	30.05 (-8.27-71.28)	0.71 (-0.2-1.68)	733.52 (-205.17-1749.99)	18.86 (-5.34-45.01)	-0.57 (-0.68 to -0.47)	-0.64 (-0.75 to -0.53)
Israel	27.34 (-7.7-64.49)	1.07 (-0.3-2.53)	675.01 (-188.92-1593.39)	26.79 (-7.53-62.72)	74.6 (-20.75-172.94)	1.05 (-0.29-2.42)	1568.39 (-440.79-3626.81)	24.41 (-6.91-56.76)	-0.58 (-0.95 to -0.22)	-0.71 (-1.05 to -0.38)
Italy	488.9 (-138.15-1140.9)	0.96 (-0.27-2.21)	11788 (-3254.13-26833.75)	25.16 (-6.87-57.16)	707.36 (-196-1629.58)	0.78 (-0.22-1.81)	13992.99 (-3889.91-32359.35)	19.23 (-5.41-44.71)	-0.90 (-1.00 to -0.81)	-1.12 (-1.22 to -1.03)
Jamaica	5.94 (-1.5-14.66)	0.62 (-0.16-1.52)	139.03 (-35.15-346.02)	15.31 (-3.89-37.99)	17.83 (-5.05-44.13)	1.08 (-0.3-2.67)	449 (-129.59-1110.4)	28.26 (-8.14-69.63)	1.78 (1.52 to 2.02)	1.96 (1.69 to 2.20)
Japan	255.27 (-79.14-596.28)	0.27 (-0.08-0.64)	7888.56 (-2435.4-18356.18)	8.69 (-2.67-20.2)	819.73 (-245.24-1884.36)	0.42 (-0.12-0.98)	17957.58 (-5379.11-41146.77)	12.33 (-3.62-28.59)	1.19 (0.96 to 1.40)	0.90 (0.63 to 1.15)
Jordan	5.27 (-1.4-12.54)	0.78 (-0.21-1.87)	171.78 (-44.03-412.74)	22.46 (-5.91-53.6)	43.38 (-12.49-107.02)	1.22 (-0.36-2.99)	1403.49 (-403.47-3379.71)	34.31 (-10-82.7)	1.71 (1.24 to 2.16)	1.58 (1.13 to 2.00)
Kazakhstan	38.68 (-10.51-88.54)	0.5 (-0.14-1.15)	1110.98 (-304.24-2571.16)	14.16 (-3.89-32.78)	60.73 (-17.01-147.35)	0.57 (-0.16-1.39)	1702.46 (-492.69-4181.08)	15.49 (-4.47-38.02)	1.35 (0.85 to 1.83)	0.98 (0.55 to 1.40)
Kenya	9.17 (-2.42-22.45)	0.22 (-0.06-0.56)	272.47 (-69.84-680.73)	5.89 (-1.53-14.53)	62.17 (-16.77-151.09)	0.51 (-0.14-1.23)	1931.08 (-519.32-4659.49)	13.7 (-3.68-33.26)	2.99 (2.78 to 3.12)	3.00 (2.82 to 3.09)
Kiribati	0.3 (-0.09-0.73)	1.49 (-0.44-3.68)	9.77 (-2.98-23.01)	42.77 (-12.92-103.11)	1 (-0.27-2.4)	2.46 (-0.66-5.88)	31.54 (-8.67-76.34)	67.42 (-18.28-162.45)	1.69 (1.59 to 1.76)	1.54 (1.44 to 1.60)
Kuwait	1.45 (-0.39-3.47)	0.64 (-0.17-1.55)	46.62 (-12.81-111.95)	17.63 (-4.86-42.68)	9.04 (-2.52-22.09)	0.7 (-0.2-1.7)	318.35 (-87.65-786.47)	19.5 (-5.4-47.04)	0.67 (0.16 to 1.19)	0.55 (-0.01 to 1.10)
Kyrgyzstan	5.41 (-1.36-12.87)	0.31 (-0.08-0.73)	161.41 (-41.37-388.52)	9.29 (-2.37-22.22)	9.98 (-2.76-23.37)	0.35 (-0.1-0.83)	309.25 (-85.62-718.78)	10.2 (-2.83-23.62)	0.24 (0.04 to 0.44)	0.06 (-0.13 to 0.25)
Lao People's Democratic Republic	4.61 (-1.01-12.73)	0.44 (-0.1-1.17)	136.63 (-28.96-385.78)	11.65 (-2.55-32.24)	18.63 (-4.3-46.55)	0.78 (-0.19-1.97)	549.13 (-122.27-1380.39)	20.72 (-4.7-52.01)	1.95 (1.84 to 2.02)	1.94 (1.84 to 2.01)
Latvia	9.51 (-2.79-22.46)	0.43 (-0.13-1.01)	262.24 (-77.64-618.65)	12.53 (-3.7-29.71)	17.57 (-4.77-43.01)	0.69 (-0.19-1.7)	389 (-107.13-964.55)	18.06 (-4.94-44.72)	1.67 (1.37 to 1.94)	1.19 (0.88 to 1.48)
Lebanon	9.22 (-2.36-22.72)	0.86 (-0.22-2.14)	253.76 (-64.76-624.16)	21.8 (-5.59-53.65)	43.83 (-13.33-105.4)	1.33 (-0.4-3.19)	1131.65 (-348.93-2653.57)	35.71 (-10.96-83.65)	1.71 (1.43 to 1.96)	1.93 (1.65 to 2.17)
Lesotho	1.19 (-0.3-3.02)	0.23 (-0.06-0.6)	29.11 (-7.54-75.1)	5.39 (-1.39-13.89)	6.14 (-1.4-17.88)	0.97 (-0.22-2.81)	163.85 (-38.45-472.3)	24.11 (-5.59-69.58)	5.73 (5.07 to 6.07)	6.04 (5.35 to 6.38)
Liberia	1.64 (-0.44-4.05)	0.32 (-0.09-0.79)	47.8 (-12.17-119.48)	8.53 (-2.2-21)	7.42 (-1.82-18.12)	0.71 (-0.17-1.74)	237.63 (-58.13-593.9)	18.93 (-4.68-46.34)	3.06 (2.78 to 3.25)	3.05 (2.73 to 3.28)
Libya	2.66 (-0.73-6.55)	0.3 (-0.08-0.74)	78.93 (-21.88-194.36)	8.44 (-2.33-20.83)	19.99 (-5.17-50.46)	0.74 (-0.18-1.88)	652.75 (-175.31-1686.02)	21.14 (-5.56-53.85)	3.23 (2.80 to 3.56)	3.34 (2.91 to 3.66)
Lithuania	9.49 (-2.45-22.78)	0.35 (-0.09-0.84)	260.54 (-66.14-631.59)	10 (-2.54-24.4)	19.67 (-5.15-47.35)	0.53 (-0.14-1.27)	428.37 (-117.1-1035.05)	13.57 (-3.78-32.91)	1.41 (1.09 to 1.71)	0.97 (0.64 to 1.29)
Luxembourg	2.54 (-0.71-5.92)	0.79 (-0.23-1.87)	59.85 (-17.29-140.96)	20.36 (-5.86-48.61)	5.84 (-1.47-14.12)	0.94 (-0.24-2.28)	120.16 (-29.96-289.23)	21.79 (-5.46-52.36)	0.92 (0.62 to 1.21)	0.57 (0.32 to 0.82)
Madagascar	6.11 (-1.61-15.56)	0.26 (-0.07-0.65)	181.3 (-48.5-458.47)	6.59 (-1.76-16.74)	21.01 (-6.01-54.07)	0.38 (-0.11-0.97)	665.75 (-186.34-1734.79)	9.66 (-2.77-24.88)	1.29 (1.03 to 1.54)	1.19 (0.93 to 1.43)
Malawi	3.28 (-0.9-7.76)	0.17 (-0.05-0.4)	97.84 (-27.19-229.68)	4.36 (-1.21-10.21)	14.47 (-3.21-36.1)	0.37 (-0.09-0.95)	418.17 (-91.75-1071.18)	9.2 (-2.04-23.08)	2.58 (2.31 to 2.78)	2.33 (2.09 to 2.52)
Malaysia	43.75 (-10.83-104.21)	0.89 (-0.22-2.13)	1351.46 (-334.93-3215.41)	25.37 (-6.3-60.79)	226.36 (-62.59-517.64)	1.6 (-0.44-3.65)	6791.75 (-1842.61-15709.87)	45.03 (-12.26-103.86)	1.92 (1.80 to 1.99)	1.84 (1.69 to 1.95)
Maldives	0.11 (-0.03-0.34)	0.32 (-0.08-0.89)	3.46 (-0.9-11.21)	8.1 (-2-24.36)	0.56 (-0.15-1.39)	0.39 (-0.1-0.94)	15.52 (-4.21-37.98)	9.6 (-2.57-23.63)	0.26 (0.01 to 0.50)	0.14 (-0.08 to 0.37)
Mali	9.69 (-2.63-22.6)	0.46 (-0.13-1.08)	323.77 (-86.26-769.19)	13.75 (-3.71-32.24)	36.06 (-9.08-90.49)	0.77 (-0.19-1.96)	1201.93 (-301.78-3027.35)	22.8 (-5.8-56.88)	1.71 (1.67 to 1.72)	1.63 (1.59 to 1.64)
Malta	2.46 (-0.66-5.72)	1.03 (-0.28-2.41)	60.62 (-16.47-143)	25.79 (-7.04-60.67)	5.12 (-1.37-12.56)	0.94 (-0.26-2.27)	109.44 (-29.66-267.98)	23.57 (-6.58-57.27)	-0.76 (-0.95 to -0.58)	-0.68 (-0.83 to -0.54)
Marshall Islands	0.16 (-0.05-0.4)	1.97 (-0.56-5.08)	4.64 (-1.37-11.95)	50.86 (-15.23-131.13)	0.55 (-0.15-1.46)	3.45 (-0.94-8.55)	17.52 (-4.81-46.99)	88.27 (-24.23-227.68)	1.75 (1.65 to 1.83)	1.71 (1.59 to 1.80)
Mauritania	1.61 (-0.39-4.17)	0.32 (-0.08-0.84)	43.39 (-10.55-114.71)	8.09 (-1.94-21.29)	6.86 (-1.74-17.37)	0.65 (-0.16-1.65)	195.37 (-49.8-503.75)	16.62 (-4.23-42.6)	2.07 (1.93 to 2.18)	2.10 (1.96 to 2.20)
Mauritius	2.38 (-0.66-5.61)	0.6 (-0.17-1.42)	69.35 (-19.5-162.09)	16.55 (-4.6-38.79)	14.91 (-4.29-34.57)	1.5 (-0.43-3.47)	412.15 (-119.45-964.16)	42.56 (-12.46-100.21)	2.37 (2.00 to 2.69)	2.45 (2.06 to 2.79)
Mexico	166.61 (-49.46-385.2)	0.77 (-0.23-1.78)	5004.68 (-1499.62-11529.21)	20.71 (-6.16-47.92)	649.91 (-187.73-1525.12)	0.94 (-0.27-2.21)	19765.72 (-5793.91-46398.03)	27.76 (-8.12-64.97)	0.42 (0.31 to 0.53)	0.66 (0.55 to 0.76)
Micronesia (Federated States of)	0.37 (-0.09-0.99)	1.53 (-0.37-4.05)	11.53 (-2.93-30.25)	44.4 (-11.36-116.38)	0.9 (-0.24-2.19)	2.23 (-0.6-5.47)	28.73 (-7.57-71.7)	64.28 (-16.99-157.03)	1.07 (0.94 to 1.19)	1.03 (0.89 to 1.16)
Monaco	0.43 (-0.11-1.01)	1.07 (-0.29-2.53)	9.47 (-2.55-22.33)	28.98 (-7.77-68.5)	0.8 (-0.23-1.87)	1.51 (-0.44-3.55)	17.67 (-5.21-42.02)	41.35 (-12.93-100.93)	1.18 (1.09 to 1.26)	1.22 (1.10 to 1.32)
Mongolia	0.45 (-0.12-1.13)	0.08 (-0.02-0.2)	14.38 (-3.82-36.48)	2.41 (-0.64-6.12)	2.1 (-0.56-5.16)	0.15 (-0.04-0.36)	69.65 (-18.5-175.56)	4.44 (-1.19-11.07)	1.95 (1.77 to 2.08)	1.82 (1.63 to 1.97)
Montenegro	3.28 (-0.89-7.78)	0.94 (-0.25-2.22)	88.47 (-24.24-214.01)	25.17 (-6.88-60.35)	8.68 (-2.64-20.78)	1.61 (-0.49-3.85)	204.92 (-62.71-489.09)	38.9 (-11.9-92.46)	2.07 (1.95 to 2.15)	1.80 (1.65 to 1.91)
Morocco	17.74 (-4.67-43.09)	0.24 (-0.07-0.58)	572.84 (-150.55-1444.29)	7.28 (-1.91-17.99)	128.72 (-34.66-330.19)	0.72 (-0.19-1.85)	4168.85 (-1224.69-10707.83)	21.99 (-6.36-56.17)	4.10 (3.82 to 4.22)	4.15 (3.87 to 4.26)
Mozambique	5.54 (-1.42-13.98)	0.22 (-0.06-0.58)	143.4 (-36.57-363.98)	4.6 (-1.19-11.64)	25.86 (-6.69-68.87)	0.49 (-0.13-1.33)	673.08 (-174.96-1792.9)	10.59 (-2.73-28.14)	3.13 (2.84 to 3.33)	3.25 (2.94 to 3.45)
Myanmar	69.95 (-17-180.54)	0.55 (-0.14-1.41)	2263.71 (-544.18-5918.83)	16.46 (-3.93-42.75)	247.9 (-65.08-605.63)	0.88 (-0.23-2.15)	7442.45 (-2024.58-18306.45)	25 (-6.75-61.28)	1.40 (1.29 to 1.48)	1.19 (1.08 to 1.28)
Namibia	1.62 (-0.42-4)	0.49 (-0.12-1.21)	46.55 (-11.67-115.2)	12.52 (-3.13-31.38)	9.76 (-2.19-24.43)	1.23 (-0.28-3.09)	279.68 (-63.63-707.04)	32.42 (-7.28-81.76)	3.58 (3.32 to 3.70)	3.66 (3.41 to 3.78)
Nauru	0.04 (-0.01-0.11)	2.06 (-0.48-5.47)	1.38 (-0.33-3.67)	57.05 (-13.23-150.52)	0.09 (-0.02-0.23)	2.71 (-0.76-7.24)	2.72 (-0.76-7.37)	75.54 (-21.11-203.16)	0.80 (0.66 to 0.93)	0.75 (0.60 to 0.90)
Nepal	8.37 (-2.07-21.05)	0.18 (-0.04-0.46)	267.87 (-68.72-670.86)	5.09 (-1.27-12.72)	44.75 (-11.31-113.68)	0.37 (-0.09-0.94)	1322.84 (-329.3-3351.5)	9.97 (-2.49-25.32)	2.31 (2.04 to 2.52)	2.15 (1.85 to 2.40)
Netherlands	106.19 (-28.12-253.9)	0.91 (-0.24-2.16)	2436.56 (-658.26-5834.24)	22.96 (-6.25-54.94)	138.21 (-38.09-325.61)	0.7 (-0.2-1.66)	3025.21 (-850.21-7096.96)	17.96 (-4.97-41.76)	-1.12 (-1.25 to -1.00)	-1.03 (-1.15 to -0.93)
New Zealand	23.69 (-7.02-54.78)	1.12 (-0.33-2.57)	626.89 (-184.74-1437.03)	31.56 (-9.3-72.89)	38.88 (-11.87-90.87)	0.88 (-0.27-2.04)	1008.01 (-305.38-2349.09)	25.25 (-7.6-58.56)	-0.62 (-0.74 to -0.51)	-0.56 (-0.68 to -0.45)
Nicaragua	1.63 (-0.42-4.01)	0.2 (-0.05-0.49)	47.8 (-12.43-118.64)	5.42 (-1.4-13.52)	10.74 (-2.73-27.16)	0.4 (-0.1-1)	314.92 (-80.45-803.66)	11.14 (-2.84-28.49)	2.49 (2.19 to 2.72)	2.53 (2.26 to 2.74)
Niger	3.18 (-0.93-8.21)	0.23 (-0.06-0.58)	106.92 (-30.88-277.95)	6.55 (-1.9-16.81)	15.7 (-3.89-38.72)	0.38 (-0.09-0.93)	486.77 (-121.73-1208.51)	9.9 (-2.46-24.24)	1.53 (1.46 to 1.58)	1.26 (1.17 to 1.32)
Nigeria	87.02 (-23.43-200.82)	0.42 (-0.11-0.97)	2347.68 (-641.09-5496.22)	10.85 (-2.96-25.16)	454.14 (-114.34-1116.87)	0.97 (-0.24-2.3)	13088.81 (-3327.07-32136.54)	23.79 (-6.03-58.55)	2.82 (2.61 to 2.94)	2.59 (2.39 to 2.73)
Niue	0.02 (-0.01-0.06)	1.75 (-0.44-4.44)	0.55 (-0.14-1.38)	46.59 (-11.68-116.3)	0.03 (-0.01-0.08)	2.76 (-0.82-6.54)	0.83 (-0.25-1.99)	73.83 (-21.94-176.11)	1.28 (1.21 to 1.34)	1.23 (1.15 to 1.30)
North Macedonia	8.1 (-2.13-19.48)	0.83 (-0.22-2)	228.17 (-59.35-541)	22.3 (-5.82-53.09)	26.22 (-7.2-63.86)	1.59 (-0.43-3.88)	635.27 (-176.66-1523.68)	36.9 (-10.22-87.98)	2.13 (1.72 to 2.50)	1.69 (1.36 to 1.99)
Northern Mariana Islands	0.15 (-0.04-0.36)	1.9 (-0.53-4.54)	5.53 (-1.61-13.61)	52.89 (-15.1-129.78)	0.53 (-0.15-1.26)	2.23 (-0.63-5.34)	16 (-4.57-37.98)	58.35 (-16.78-139.77)	0.45 (0.28 to 0.62)	0.28 (0.11 to 0.46)
Norway	33.73 (-9.59-78.48)	0.85 (-0.25-1.96)	727.35 (-208.15-1694)	21.65 (-6.31-49.76)	33.98 (-9.59-77.25)	0.58 (-0.17-1.35)	702.86 (-199.2-1630.69)	14.38 (-4.09-33.68)	-1.45 (-1.56 to -1.36)	-1.54 (-1.68 to -1.42)
Oman	0.43 (-0.11-1.08)	0.14 (-0.04-0.37)	12.78 (-3.25-32.07)	4.03 (-1.02-10.14)	2.48 (-0.61-5.84)	0.28 (-0.07-0.64)	82.62 (-20.53-199.01)	8.09 (-2-19.24)	2.23 (1.81 to 2.59)	2.32 (1.90 to 2.69)
Pakistan	168.45 (-44.25-403.62)	0.66 (-0.17-1.57)	5279.17 (-1376.65-12689.08)	18.67 (-4.9-44.8)	974.2 (-307.66-2234.95)	1.64 (-0.51-3.75)	30764.17 (-9632.5-69608.17)	44.63 (-14.2-102.13)	2.97 (2.67 to 3.18)	2.77 (2.48 to 2.99)
Palau	0.14 (-0.04-0.34)	3.04 (-0.85-7.22)	4.05 (-1.13-9.87)	77.06 (-21.53-184.8)	0.37 (-0.11-0.87)	3.92 (-1.08-9.26)	10 (-2.91-23.62)	91.34 (-26.17-217.55)	0.83 (0.78 to 0.88)	0.49 (0.44 to 0.53)
Palestine	3.22 (-0.73-8.57)	0.69 (-0.16-1.84)	91.78 (-22.03-247.12)	18.44 (-4.34-49.62)	16.03 (-4.33-38.67)	1.24 (-0.33-2.98)	488.95 (-134.72-1183.97)	33.75 (-9.23-81.11)	2.15 (1.97 to 2.27)	2.18 (2.02 to 2.29)
Panama	2.91 (-0.75-7.04)	0.4 (-0.1-0.97)	80.13 (-20.95-191.54)	10.48 (-2.74-24.86)	16.96 (-4.79-41.16)	0.74 (-0.21-1.8)	472.69 (-139.39-1137.57)	20.96 (-6.18-50.44)	2.04 (1.87 to 2.17)	2.30 (2.14 to 2.41)
Papua New Guinea	5.32 (-1.48-13.33)	0.54 (-0.15-1.37)	188.55 (-52.8-467.46)	17.09 (-4.75-42.89)	23.27 (-5.28-56.41)	0.85 (-0.19-2.11)	821.6 (-187.42-1985.99)	25.79 (-5.88-62.71)	1.34 (1.23 to 1.44)	1.21 (1.10 to 1.31)
Paraguay	4.47 (-1.13-10.53)	0.39 (-0.1-0.91)	125.05 (-31.92-296.04)	10.4 (-2.66-24.54)	28.61 (-7.74-69.86)	0.94 (-0.25-2.31)	774.44 (-212.4-1850.86)	24.77 (-6.76-59.56)	2.97 (2.69 to 3.16)	2.85 (2.58 to 3.05)
Peru	14.87 (-4.08-35.78)	0.24 (-0.07-0.59)	416.89 (-114.55-984.65)	6.44 (-1.78-15.12)	70.08 (-18.16-174.23)	0.4 (-0.1-0.99)	1854.86 (-503.14-4573.17)	10.45 (-2.83-25.74)	1.25 (1.04 to 1.45)	1.21 (0.96 to 1.44)
Philippines	80.7 (-22.83-196.29)	0.63 (-0.17-1.54)	2217.25 (-631.03-5396.34)	14.12 (-3.97-34.27)	365.93 (-91.26-923.04)	0.84 (-0.21-2.11)	10412.64 (-2598.47-26179.32)	22.11 (-5.53-55.63)	0.88 (0.76 to 1.00)	1.35 (1.24 to 1.44)
Poland	210.03 (-60.3-487.36)	0.82 (-0.24-1.92)	5312.63 (-1509.33-12431.45)	21.57 (-6.11-50.51)	541.59 (-152.3-1241.36)	1.21 (-0.34-2.79)	11083.27 (-3128.98-25653.09)	28.02 (-7.83-65.62)	1.01 (0.85 to 1.15)	0.68 (0.54 to 0.81)
Portugal	68.83 (-20.24-163.46)	0.9 (-0.27-2.13)	1721.39 (-509.52-4095.91)	23.51 (-6.97-56.07)	127.19 (-35.41-300.77)	0.85 (-0.24-1.97)	2635.88 (-731.96-6249.56)	21.62 (-6.1-52.01)	-0.35 (-0.50 to -0.21)	-0.43 (-0.63 to -0.23)
Puerto Rico	20.66 (-6.06-48.71)	1.08 (-0.32-2.55)	556.84 (-166.19-1299.81)	29.15 (-8.68-68.03)	45.94 (-13.38-107.29)	1.18 (-0.35-2.7)	1079.39 (-319.76-2479.78)	32.95 (-9.84-74.05)	0.24 (0.08 to 0.39)	0.33 (0.18 to 0.47)
Qatar	0.52 (-0.14-1.27)	1.56 (-0.41-3.89)	17.6 (-4.62-42.41)	40.07 (-10.59-98.09)	6.13 (-1.83-13.73)	2.2 (-0.7-5.05)	213.46 (-61.99-486.45)	58.21 (-18.2-132.54)	1.50 (1.15 to 1.84)	1.62 (1.33 to 1.88)
Republic of Korea	29.21 (-7.63-70.19)	0.16 (-0.04-0.39)	1026.81 (-274.18-2472.38)	5.28 (-1.4-12.65)	121.77 (-35.21-291.93)	0.25 (-0.07-0.6)	3710.6 (-1081.04-8799.89)	8.22 (-2.35-19.34)	1.38 (1.28 to 1.47)	1.54 (1.48 to 1.59)
Republic of Moldova	13.73 (-3.78-31.8)	0.53 (-0.15-1.22)	413.04 (-114.97-953.08)	15.7 (-4.36-36.12)	25.15 (-6.81-60.55)	0.71 (-0.19-1.71)	680.49 (-183.48-1621.51)	20.25 (-5.52-48.6)	1.74 (1.35 to 2.09)	1.41 (1.07 to 1.73)
Romania	74.01 (-19.96-175.17)	0.49 (-0.13-1.15)	2090.67 (-554.97-4893.86)	13.77 (-3.69-31.96)	210.34 (-58.36-494.34)	0.98 (-0.27-2.3)	4884.83 (-1344.2-11443.85)	25.89 (-6.86-60.05)	2.25 (2.09 to 2.36)	2.03 (1.90 to 2.13)
Russian Federation	395.76 (-115.16-922.38)	0.35 (-0.1-0.81)	11494.36 (-3360.43-26553.05)	10.65 (-3.1-24.53)	1017.03 (-283.99-2389.68)	0.68 (-0.19-1.59)	25460.5 (-7246.88-59536.37)	18.25 (-5.16-43.01)	1.86 (1.54 to 2.14)	1.40 (1.11 to 1.68)
Rwanda	4.26 (-1.07-11.64)	0.31 (-0.07-0.85)	126.69 (-31.53-344.83)	7.64 (-1.92-20.87)	14.18 (-3.64-36.02)	0.45 (-0.11-1.17)	370.98 (-95.76-919.63)	9.98 (-2.56-25.28)	0.94 (0.67 to 1.21)	0.48 (0.17 to 0.78)
Saint Kitts and Nevis	0.4 (-0.11-0.98)	1.89 (-0.53-4.55)	9.3 (-2.63-22.5)	47.2 (-13.37-113.51)	0.63 (-0.18-1.53)	1.77 (-0.49-4.26)	16.72 (-4.87-40.31)	43.12 (-12.46-104.32)	0.43 (0.21 to 0.66)	0.22 (0.01 to 0.42)
Saint Lucia	0.69 (-0.2-1.7)	1.49 (-0.42-3.64)	17.18 (-4.81-41.69)	36.32 (-10.12-88.39)	1.85 (-0.56-4.32)	1.44 (-0.43-3.36)	48.19 (-14.74-113.04)	38.37 (-11.74-89.99)	-0.46 (-0.80 to -0.12)	0.07 (-0.26 to 0.40)
Saint Vincent and the Grenadines	0.54 (-0.15-1.28)	1.39 (-0.37-3.29)	12.86 (-3.45-30.02)	33.59 (-9.02-77.84)	1.22 (-0.35-2.94)	1.75 (-0.49-4.22)	32.35 (-9.18-78.74)	46.19 (-13.12-112.05)	0.85 (0.53 to 1.16)	1.12 (0.83 to 1.40)
Samoa	0.43 (-0.13-1)	1 (-0.3-2.37)	12.56 (-3.72-30.06)	27.54 (-8.17-65.72)	1.18 (-0.33-2.81)	1.61 (-0.45-3.84)	35.45 (-9.94-86.18)	45.74 (-13.02-110.16)	1.58 (1.49 to 1.65)	1.66 (1.57 to 1.73)
San Marino	0.13 (-0.04-0.3)	0.64 (-0.19-1.54)	2.86 (-0.84-6.94)	16.15 (-4.68-39.49)	0.19 (-0.05-0.48)	0.47 (-0.11-1.19)	4.36 (-1.05-10.99)	12.63 (-3-31.83)	-0.29 (-0.57 to -0.01)	-0.01 (-0.30 to 0.29)
Sao Tome and Principe	0.07 (-0.02-0.18)	0.21 (-0.05-0.51)	1.88 (-0.47-4.67)	5.39 (-1.35-13.35)	0.35 (-0.1-0.88)	0.61 (-0.16-1.5)	10.36 (-3.02-26.48)	15.82 (-4.48-40.2)	3.51 (3.39 to 3.51)	3.53 (3.39 to 3.55)
Saudi Arabia	7.02 (-1.96-17.06)	0.27 (-0.07-0.64)	243.17 (-67.77-590.14)	7.99 (-2.27-19.3)	69.36 (-19.23-164.85)	0.64 (-0.18-1.55)	2895.04 (-792.08-6872.3)	21.16 (-5.79-51.69)	2.63 (2.22 to 2.98)	2.96 (2.56 to 3.28)
Senegal	6.27 (-1.7-14.6)	0.41 (-0.11-0.95)	181.71 (-50.26-423.92)	10.53 (-2.88-24.32)	34.79 (-9.09-85.5)	0.9 (-0.23-2.19)	971.25 (-255.28-2352.29)	22.36 (-5.89-54.76)	2.77 (2.64 to 2.83)	2.62 (2.48 to 2.70)
Serbia	60.77 (-15.47-145.18)	1.06 (-0.27-2.57)	1585.03 (-401.53-3744.88)	25.77 (-6.58-61.15)	145.87 (-37.99-364.47)	1.54 (-0.4-3.8)	3261.33 (-867.91-7971.31)	37.44 (-9.96-91.14)	0.97 (0.83 to 1.10)	0.98 (0.83 to 1.13)
Seychelles	0.21 (-0.06-0.5)	0.68 (-0.19-1.6)	5.8 (-1.61-13.4)	19.71 (-5.47-45.51)	0.86 (-0.23-2.01)	1.4 (-0.37-3.28)	24.39 (-6.63-58.48)	38.68 (-10.36-92.24)	2.09 (1.61 to 2.52)	1.99 (1.53 to 2.41)
Sierra Leone	2.08 (-0.54-4.96)	0.22 (-0.06-0.52)	57.1 (-14.16-134.67)	5.55 (-1.39-13.19)	9.71 (-2.6-24.08)	0.54 (-0.14-1.33)	275.62 (-74.38-698.95)	13.55 (-3.64-33.72)	3.38 (3.18 to 3.47)	3.33 (3.13 to 3.41)
Singapore	8.9 (-2.47-20.28)	0.72 (-0.2-1.62)	286.31 (-80.12-653.97)	21.37 (-5.93-48.63)	25.39 (-7.41-58.14)	0.57 (-0.17-1.3)	728.34 (-216.61-1665.29)	16.79 (-5.01-38.22)	-0.57 (-0.74 to -0.41)	-0.59 (-0.77 to -0.42)
Slovakia	24.52 (-6.75-58.64)	0.71 (-0.19-1.71)	626.98 (-170.73-1502.93)	18.8 (-5.07-45.29)	55.25 (-14.3-130.77)	0.98 (-0.25-2.31)	1262.94 (-329.73-2984.63)	24 (-6.28-57.21)	0.82 (0.63 to 1.00)	0.56 (0.38 to 0.74)
Slovenia	12.3 (-3.39-28)	0.81 (-0.22-1.85)	290 (-80.24-664.04)	20.07 (-5.55-46.15)	24.27 (-6.73-57.61)	0.85 (-0.24-2.05)	455.78 (-129.72-1101.93)	19.12 (-5.37-46.21)	-0.16 (-0.46 to 0.14)	-0.40 (-0.71 to -0.08)
Solomon Islands	0.29 (-0.07-0.74)	0.48 (-0.12-1.24)	9.47 (-2.55-24.74)	13.2 (-3.42-33.92)	1.66 (-0.41-4.19)	0.95 (-0.24-2.43)	54.43 (-13.55-136.4)	26.25 (-6.55-65.65)	2.13 (1.96 to 2.26)	2.15 (1.98 to 2.28)
Somalia	2.54 (-0.63-6.93)	0.21 (-0.05-0.58)	82.77 (-21.12-226.06)	5.48 (-1.34-15.02)	10.11 (-2.59-25.84)	0.33 (-0.09-0.86)	303.71 (-79.07-785.71)	7.89 (-2.04-20.13)	1.50 (1.41 to 1.56)	1.20 (1.12 to 1.26)
South Africa	59.62 (-15.85-141.22)	0.53 (-0.14-1.26)	1526.87 (-416.15-3565.99)	12.52 (-3.39-29.35)	291.34 (-78.47-712.13)	1.12 (-0.3-2.75)	7559.63 (-2079.09-18436.14)	27.43 (-7.51-67.05)	2.98 (2.70 to 3.18)	3.21 (2.89 to 3.43)
South Sudan	2.3 (-0.59-6.3)	0.23 (-0.06-0.61)	63.75 (-17.18-171.28)	5.7 (-1.53-15.47)	6.32 (-1.54-16.22)	0.36 (-0.09-0.91)	195.25 (-46.52-509.05)	8.96 (-2.17-22.96)	1.49 (1.27 to 1.69)	1.45 (1.19 to 1.69)
Spain	269.7 (-80.34-640.1)	0.87 (-0.26-2.06)	6470.14 (-1903.3-15523.34)	22.51 (-6.61-53.5)	392.92 (-102.21-954.99)	0.66 (-0.17-1.6)	8233.17 (-2173.48-19814.94)	16.93 (-4.55-40.61)	-0.96 (-1.12 to -0.80)	-1.06 (-1.21 to -0.93)
Sri Lanka	18.61 (-4.86-47.89)	0.37 (-0.1-0.95)	521.38 (-136.9-1335.47)	9.17 (-2.4-23.81)	94.2 (-27.01-243.57)	0.62 (-0.18-1.62)	2488.66 (-698.93-6521.11)	16.37 (-4.54-42.83)	1.99 (1.75 to 2.20)	2.23 (1.93 to 2.48)
Sudan	7.54 (-2.01-20.92)	0.17 (-0.04-0.45)	236.7 (-60.98-657.17)	4.82 (-1.26-13.13)	41.03 (-10.7-104.76)	0.42 (-0.11-1.03)	1386.29 (-366.9-3662.64)	12.31 (-3.21-31.6)	3.17 (3.04 to 3.19)	3.23 (3.09 to 3.27)
Suriname	1.07 (-0.28-2.63)	0.82 (-0.21-2.04)	29.96 (-7.92-72.57)	21.61 (-5.66-52.1)	3.83 (-0.93-9.34)	1.11 (-0.27-2.73)	107.51 (-26.86-259.77)	31.01 (-7.68-75.25)	1.35 (1.18 to 1.51)	1.50 (1.32 to 1.66)
Sweden	46.4 (-12.9-109.81)	0.56 (-0.16-1.31)	1081.18 (-304.7-2540.97)	15.25 (-4.25-35.41)	69.88 (-17.21-165.03)	0.56 (-0.14-1.36)	1426.34 (-345.42-3436.92)	13.98 (-3.46-33.42)	0.31 (0.05 to 0.57)	0.06 (-0.25 to 0.36)
Switzerland	50.67 (-13.92-121.67)	0.82 (-0.23-1.95)	1140.65 (-319.58-2717.76)	20.82 (-5.86-49.87)	80.34 (-19.99-193.21)	0.73 (-0.18-1.76)	1601.58 (-403.42-3816.21)	17.19 (-4.42-40.76)	-0.25 (-0.42 to -0.08)	-0.52 (-0.70 to -0.35)
Syrian Arab Republic	7.9 (-1.86-18.41)	0.31 (-0.07-0.72)	256.61 (-61.87-593.99)	8.98 (-2.12-20.87)	42.12 (-10.49-100.6)	0.66 (-0.16-1.58)	1342.67 (-340.09-3263.94)	18.35 (-4.56-44.2)	2.40 (2.20 to 2.54)	2.25 (2.09 to 2.36)
Taiwan (Province of China)	26.64 (-7.54-60.81)	0.34 (-0.1-0.79)	874.36 (-249.91-1994.52)	10.55 (-3.02-24.24)	144.9 (-40.31-344.74)	0.65 (-0.18-1.53)	4026.45 (-1132.86-9232.01)	18.93 (-5.34-43.08)	2.11 (1.86 to 2.31)	1.93 (1.70 to 2.11)
Tajikistan	5.65 (-1.48-14.09)	0.37 (-0.1-0.91)	175.79 (-47.07-438.44)	11.3 (-3.03-27.95)	13.89 (-3.6-35.09)	0.42 (-0.11-1.08)	460.37 (-115.18-1146.97)	12.53 (-3.19-31.55)	0.42 (0.24 to 0.59)	0.29 (0.12 to 0.47)
Thailand	56.62 (-15.62-136.47)	0.3 (-0.08-0.72)	1724.81 (-487.31-4075.58)	8.15 (-2.27-19.34)	383.4 (-107.88-936.45)	0.64 (-0.18-1.57)	10115.79 (-2854.61-25169.91)	17.46 (-4.92-43.58)	2.61 (2.32 to 2.83)	2.52 (2.25 to 2.73)
Timor-Leste	0.24 (-0.06-0.62)	0.18 (-0.05-0.44)	7.63 (-1.94-20.33)	4.64 (-1.18-12.12)	1.78 (-0.43-4.96)	0.43 (-0.1-1.17)	48.7 (-11.87-135.29)	11.07 (-2.72-30.73)	2.91 (2.75 to 2.98)	2.90 (2.75 to 2.96)
Togo	1.46 (-0.38-3.52)	0.24 (-0.06-0.59)	43.59 (-11.44-105.56)	6.01 (-1.53-14.41)	9.86 (-2.41-24.67)	0.48 (-0.12-1.2)	289.01 (-69.15-706.49)	12.04 (-2.92-29.93)	2.28 (2.17 to 2.34)	2.23 (2.10 to 2.32)
Tokelau	0.01 (0-0.03)	2.03 (-0.56-5.17)	0.38 (-0.11-0.96)	55.87 (-16.42-142.16)	0.02 (-0.01-0.05)	2.81 (-0.86-6.87)	0.56 (-0.16-1.36)	75.26 (-21.79-183.56)	1.08 (1.05 to 1.10)	0.93 (0.90 to 0.95)
Tonga	0.56 (-0.16-1.29)	1.93 (-0.56-4.52)	17.07 (-5.09-38.75)	54.77 (-16.19-124.56)	1.19 (-0.35-2.97)	2.76 (-0.81-6.92)	33.68 (-9.77-83.33)	77.14 (-22.48-191.29)	1.02 (0.92 to 1.12)	0.87 (0.73 to 1.00)
Trinidad and Tobago	5.29 (-1.54-12.84)	1.26 (-0.36-3.05)	140.1 (-40.53-337.07)	31.91 (-9.27-76.64)	13.83 (-3.7-34.75)	1.36 (-0.36-3.41)	368.08 (-98.91-922.28)	37.31 (-10-93.1)	0.41 (0.22 to 0.59)	0.65 (0.47 to 0.83)
Tunisia	7.65 (-1.91-18.93)	0.33 (-0.08-0.81)	221.77 (-54.47-554.7)	8.62 (-2.13-21.59)	41.45 (-12.39-103.73)	0.6 (-0.18-1.5)	1223.29 (-367.45-3085.3)	17.15 (-5.17-43.18)	1.75 (1.58 to 1.90)	2.04 (1.86 to 2.18)
Turkmenistan	2.89 (-0.79-6.68)	0.26 (-0.07-0.59)	88.76 (-23.91-208.01)	7.68 (-2.07-17.96)	10.69 (-2.51-24.8)	0.45 (-0.11-1.04)	351.53 (-81.71-813.2)	14.08 (-3.28-32.64)	2.37 (1.83 to 2.85)	2.64 (2.09 to 3.12)
Tuvalu	0.04 (-0.01-0.1)	0.98 (-0.25-2.63)	1.07 (-0.28-2.92)	26.66 (-7.05-72.01)	0.08 (-0.02-0.2)	1.45 (-0.37-3.68)	2.18 (-0.57-5.6)	38.9 (-10.3-99.36)	1.12 (0.97 to 1.25)	1.04 (0.88 to 1.18)
T眉rkiye	30.94 (-8.48-73.06)	0.16 (-0.05-0.39)	975.61 (-268.91-2313.2)	4.89 (-1.35-11.62)	352.3 (-94.5-818.67)	0.71 (-0.19-1.65)	10200.32 (-2845.72-23833.89)	20.22 (-5.66-47.38)	6.22 (5.25 to 6.82)	5.92 (5.01 to 6.49)
Uganda	10.03 (-2.57-25.12)	0.34 (-0.09-0.86)	267.9 (-69.47-680.64)	7.89 (-2.05-19.74)	56.53 (-12.66-143.78)	0.71 (-0.16-1.81)	1601.9 (-368.03-4034.85)	17.78 (-4-44.82)	2.09 (1.87 to 2.27)	2.22 (1.96 to 2.42)
Ukraine	235.07 (-67.29-569.14)	0.53 (-0.15-1.3)	6678.21 (-1894.88-16202.91)	16.14 (-4.53-39.04)	261.89 (-69.53-630.05)	0.55 (-0.15-1.34)	6786.13 (-1809.44-16419.8)	15.52 (-4.08-38.14)	-0.28 (-0.50 to -0.05)	-0.58 (-0.82 to -0.34)
United Arab Emirates	2.09 (-0.59-4.99)	1.33 (-0.37-3.19)	69.37 (-19.2-165.64)	37.62 (-10.72-91.62)	22.83 (-6.47-53.96)	3.75 (-1.12-9.12)	817.02 (-221.92-1908.37)	82.81 (-24.82-202.48)	4.95 (4.32 to 5.35)	3.75 (3.27 to 4.09)
United Kingdom	443.96 (-118.75-1071.36)	0.83 (-0.22-2)	9788.29 (-2653.6-23579.46)	20.91 (-5.73-50.69)	594.77 (-148.8-1470.82)	0.77 (-0.19-1.91)	11969.23 (-3023.77-29474.92)	18.2 (-4.64-44.33)	-0.29 (-0.39 to -0.19)	-0.49 (-0.57 to -0.41)
United Republic of Tanzania	12 (-2.86-28.67)	0.24 (-0.06-0.58)	347.41 (-83.63-829.37)	5.83 (-1.4-13.87)	64.04 (-16.17-159.94)	0.5 (-0.13-1.24)	1837.48 (-451.37-4603.04)	12.28 (-3.06-30.96)	2.45 (2.29 to 2.54)	2.52 (2.35 to 2.62)
United States Virgin Islands	0.71 (-0.19-1.65)	1.63 (-0.42-3.78)	19.85 (-5.24-46.31)	41.03 (-10.77-96.07)	1.34 (-0.38-3.28)	1.44 (-0.41-3.51)	33.24 (-9.43-80.87)	40.33 (-11.62-98.76)	-0.14 (-0.32 to 0.04)	0.27 (0.11 to 0.43)
United States of America	1936.04 (-566.18-4502.03)	1.07 (-0.32-2.5)	50449.15 (-14826.17-117838.71)	30.49 (-8.99-71.03)	3656.37 (-1049.96-8632.48)	1.12 (-0.33-2.63)	88878.47 (-26164.58-207291.28)	30.18 (-8.98-70.16)	0.13 (0.03 to 0.23)	-0.06 (-0.16 to 0.03)
Uruguay	17.36 (-4.7-41.86)	0.79 (-0.21-1.9)	424.86 (-114.16-1020.68)	20.49 (-5.51-49.03)	40.68 (-10.26-98.39)	1.2 (-0.31-2.89)	856.85 (-227.3-2064.27)	29.33 (-7.99-70.24)	1.15 (1.04 to 1.25)	1.02 (0.91 to 1.11)
Uzbekistan	14.58 (-4.01-36.39)	0.22 (-0.06-0.56)	438.85 (-123.87-1100.78)	6.63 (-1.85-16.58)	67.44 (-17.96-170.44)	0.44 (-0.12-1.12)	2147.89 (-580.7-5400.04)	13.08 (-3.51-33.03)	2.70 (2.49 to 2.84)	2.55 (2.35 to 2.69)
Vanuatu	0.18 (-0.05-0.45)	0.64 (-0.17-1.58)	6.06 (-1.58-15.15)	17.72 (-4.66-44.33)	1.15 (-0.31-2.83)	1.3 (-0.34-3.17)	37.47 (-10.16-91.71)	36.01 (-9.66-87.98)	2.16 (2.00 to 2.27)	2.12 (1.95 to 2.26)
Venezuela (Bolivarian Republic of)	24.23 (-6.51-55.83)	0.47 (-0.13-1.1)	730.17 (-195.62-1686.52)	13.21 (-3.54-30.35)	148.78 (-41.09-364.01)	0.91 (-0.25-2.24)	4214.28 (-1172.65-10309.45)	25.49 (-7.08-62.41)	1.93 (1.72 to 2.11)	1.93 (1.72 to 2.12)
Viet Nam	42.48 (-11.73-107.55)	0.19 (-0.05-0.47)	1128.18 (-315.46-2844.81)	4.86 (-1.36-12.23)	187.11 (-44.63-501.23)	0.34 (-0.08-0.91)	4960.61 (-1211.79-13335.14)	8.6 (-2.11-23.24)	1.96 (1.92 to 1.97)	1.85 (1.77 to 1.89)
Yemen	2.89 (-0.74-7.18)	0.11 (-0.03-0.28)	91.13 (-23.85-222.7)	3.27 (-0.84-8.08)	21.81 (-5.68-54.1)	0.3 (-0.08-0.75)	700.1 (-183.35-1718.4)	8.29 (-2.17-20.4)	3.51 (3.28 to 3.62)	3.40 (3.16 to 3.53)
Zambia	5.46 (-1.41-14.42)	0.45 (-0.11-1.16)	164.15 (-43.12-431.75)	10.8 (-2.8-28.35)	37.38 (-8.58-95.42)	1.05 (-0.24-2.67)	1168.81 (-277.95-2950.11)	27.11 (-6.24-68.74)	3.00 (2.61 to 3.31)	3.18 (2.73 to 3.53)
Zimbabwe	9.73 (-2.3-24.88)	0.51 (-0.12-1.34)	248.21 (-58.11-624.85)	11.73 (-2.72-29.43)	43.34 (-9.88-105.22)	1.13 (-0.26-2.72)	1270.66 (-283.64-3077.36)	28.92 (-6.55-69.98)	3.41 (2.77 to 3.93)	3.93 (3.17 to 4.53)
ASMR, age-standardized mortality rate; UI, uncertainty interval; DALYs, disability-adjusted life years; ASDR, age-standardized DALY rate
